# Supplementary material
Source: publisher site journal article supplement (https://www.dovepress.com/get_supplementary_file.php?f=350246.docx)
Supplement: Supplementary file 1 [file get_supplementary_file.php]

**Supplementary Materials**

**“Getting Started”: A Pilot Introductory Narrative Writing Session for Interprofessional Faculty in Academic Health Sciences**

**Contents**

[Supplementary material 1. Narrative Needs Assessment Survey 2](#_Toc93693907)

[Supplementary material 2. *The Narrative Writing Program (NWP): Writing from the Front Lines of Clinical Care, Education, and Research* Series Session Timeline 3](#_Toc93693908)

[Supplementary material 3. “Getting Started in Narrative Writing” Session Facilitators’ Guide 4](#_Toc93693909)

[Supplementary material 4. “Getting Started in Narrative Writing” Session Evaluation 6](#_Toc93693910)

# Supplementary material 1. Narrative Needs Assessment Survey

***Consent statement:*** *You are being asked to voluntarily participate in a research study. We are doing this study to understand the perceptions of narrative medicine and conduct a brief needs assessment for clinician educators, clinicians, and other faculty and staff at the university about the role for narrative medicine within the school. If you agree, we will ask you to complete a brief needs assessment survey, taking up to 10 minutes. The survey will be anonymous and not be linked back to you. If you have any questions, please contact the facilitators.*

1. Narrative medicine can be conceptualized as a medical framework that values and integrates the skills of perceiving and interpreting individuals’ unique stories in medical practice. It incorporates a focus on empathic listening and others- and self-awareness through the medium of oral and written narratives*.* How familiar are you with the principles of narrative medicine?

| Very Unfamiliar | Somewhat Unfamiliar | Somewhat Familiar | Very Familiar |
| --- | --- | --- | --- |
| 1 | 3 | 4 | 6 |

1. How interested are you in engaging with narrative medicine in your clinical, educational, and/or academic work?

| Very Uninterested | Somewhat Uninterested | Undecided | Somewhat Interested | Very Interested |
| --- | --- | --- | --- | --- |
| 1 | 2 | 3 | 4 | 5 |

**ASK IF RESPONSE TO Q3 IS < 4:**

2a. Why aren’t you interested in narrative medicine? *[Check all that apply]*

- Not enough time
- Not familiar with narrative medicine
- Not confident about my skills related to narrative medicine
- Not interested in the narrative medicine healthcare framework
- My area of expertise does not lend itself well to narrative medicine
- The university does not value narrative medicine
- Other: (fill in)

1. What do you know about narrative medicine or a narrative-based approach to medicine? (open-ended)
2. What do you perceive to be the overall goals, or purposes, of narrative medicine education? (open-ended)
3. What, if any, gaps would a narrative medicine program fill within the Department of Medicine/BU School of Medicine/BU Medical Campus? (open-ended)
4. What specific knowledge and skills do you think participants should gain from the completion of a narrative medicine program? (open-ended)

# Supplementary material 2. Table S1: *The Narrative Writing Program (NWP): Writing from the Front Lines of Clinical Care, Education, and Research* Series Session Timeline

| **Session Number** | **Session Title** |
| --- | --- |
| **1** | Getting Started in Narrative Writing |
| **2** | Point of View |
| **3** | Character |
| **4** | Elements of Plot |
| **5** | Special Poetry Workshop |
| **6** | Narrative Modes |
| **7** | Voice |
| **8** | Finishing Well |

# Supplementary material 3. Table S2: “Getting Started in Narrative Writing” Session Facilitators’ Guide

| **Writing Theme** | Getting Started: Introductory Narrative Writing Pilot Session for Faculty in Academic Health Sciences |
| --- | --- |
| **Facilitator(s)** |  |
| **Date** |  |
| **Resources Needed** | - Tent cards with participant names - Journals (1/participant) - Writing prompt handout based on David Foster Wallace’s quote on perfectionism and W. B. Yeats’ “Lake Isle of Innisfree” poem,(1, 2) participant narratives for workshopping, session evaluation forms (1/participant) |
| **Learning Objectives** | At the end of the session, participants will be able to:   - Identify and implement strategies for overcoming perfectionism in regards to “getting started” with narrative writing projects. - Acquire new writing competencies and self-efficacy to generate publishable narratives. - Foster reflection and finding one’s narrative voice for professional and personal well-being. - Explore ways to engage more empathically with patients, learners, colleagues, and self by refining skills for listening to and interpreting personal narratives. - Practice constructive and generative workshopping of colleagues’ narratives in a small-group setting. |
| **Participant Preparation** | Review the session pre-readings, distributed 2 weeks in advance:   - Two chapters, “Perfectionism” and “Shitty First Drafts,” from *Bird by Bird: Some Instructions on Writing and Life* by Anne Lamott (Anchor, 1995)(3) - Weinberg RB. First Love. *Ann Intern Med*. 1997;126(4):327-329.(4)   *Additional Resources*   - Moniz T, Lingard L, Watling C. Stories Doctors Tell. *JAMA.* 2017;318(2):124-125.(5) - Krzywinski M, Cairo A. Points of view: Storytelling. *Nat Methods*. 2013;10(8):687.(6) |
| **Participant**  **Commitment** | - Work towards the long-term goal of producing a piece of narrative writing that you feel comfortable submitting to a peer-reviewed journal or other venue (e.g. newspaper, blog). |

| **Topic** | **Content** | **Activity/Pedagogy** | **Time** |
| --- | --- | --- | --- |
| **Introduction** |  | - Briefly review themes and learning outcomes: - New writing competencies and self-efficacy - Foster reflection and finding one’s voice - Engage more empathically with others - Refine listening skills - Grow in understanding of the power of storytelling - Remind participants of their commitment to: - Engage in honest self-reflection and conversation. - Maintain confidentiality (nothing leaves the room!). | 0:00-0:05 |
| **Participants’ Goals** |  | - Ask learners to take turns sharing their names, department/sections, and one thing they are hoping to get out of the session. | 0:05-0:15 |
| **Reflective Writing Prompts** | - Journals | - Distribute journals and “Two Writing Prompts” handout. - Prompt learners to spend a few minutes writing about either prompt (10 min):  1. David Foster Wallace’s quote about perfectionism > *Write about how perfectionism relates to your writing process.* 2. William Butler Yeats’ poem, “The Lake Isle of Innisfree” > *Write about your metaphorical “Lake Isle.”*  - Ask for volunteers to share their writings with the group (10 min). | 0:15-0:35 |
| **Discussion of Pre-Readings** | - Pre-readings | Spend a few minutes discussing learner reactions to the pre-readings:   - “Perfectionism” and “Shitty First Drafts” by Anne Lamott - Ask faculty how they relate to the author’s feelings and advice about writing. - “First Love” by Richard Weinberg, MD - Ask faculty about their impressions of the piece. Did it “work” as a story? If so, what caused the narrative to “succeed”? | 0:35-0:50 |
| **Commitment** | - Journals | - Direct participants to journal their reflections from the discussion, as well as their writing-related commitments (5 min). - Ask for volunteers to share what they wrote with the group (5 min). | 0:50-1:00 |
| **Break** |  |  | 1:00-1:05 |
| **Writing Workshop** | - 2 participant narratives for workshopping | - Distribute hard copies of narrative for workshopping. - Ask the first faculty member whose draft is being workshopped to read her/his piece aloud. In an open forum format, facilitate peer coaching as learners share their feedback on the draft. Repeat the process for the second participant whose draft is being workshopped. | 1:05-1:55  25 min/ draft |
| **Evaluation** | - Session evaluation forms | - Distribute session evaluations for learners to complete and collect the forms as the session closes. | 1:55-2:00 |

**References**

1. Baer D. David Foster Wallace explained in 2 sentences why perfectionism destroys creativity 2015 [Available from: <https://www.businessinsider.com/david-foster-wallace-on-perfectionism-2015-2>.]

2. Yeats WB. The Lake Isle of Innisfree: Poetry Foundation; [Available from: <https://www.poetryfoundation.org/poems/43281/the-lake-isle-of-innisfree>.]

3. Lamott A. Bird by Bird: Some Instructions on Writing and Life. 1st Anchor Books ed. New York: Anchor Books; 1995. xxxi, 239 p. p.

4. Weinberg RB. First Love. Ann Intern Med. 1997;126(4):327-9.

5. Moniz T, Lingard L, Watling C. Stories Doctors Tell. JAMA. 2017;318(2):124-5.

6. Krzywinski M, Cairo A. Points of view: Storytelling. Nat Methods. 2013;10(8):687.

# Supplementary material 4. “Getting Started in Narrative Writing” Session Evaluation

***Consent statement:*** *You are being asked to voluntarily participate in a research study. We are doing the study to understand the experiences of faculty members participating in the Narrative Writing Program (NWP). If you agree, we will ask you to complete a brief survey, taking up to 10 minutes. The anonymous survey will not be linked back to you. If you have any questions, please contact the facilitators.*

1. Were you able to adequately prepare for today’s session by completing the pre-work?

- Yes
- No
- Somewhat

If “No” or “Somewhat” - what barriers did you experience to completing the pre-work for today’s session?

1. Please rate today’s session:

|  | **Poor 1** | **Fair 2** | **Good 3** | **Very Good 4** | **Excellent 5** |
| --- | --- | --- | --- | --- | --- |
| Overall quality and value of session |  |  |  |  |  |
| Relevance to my professional work |  |  |  |  |  |
| Relevance to my personal growth |  |  |  |  |  |

1. Please indicate if you found today’s session relevant for enhancing your skills and/or growth in the following areas (check as many as apply):
   - Active listening
   - Communication with colleagues, learners, and/or patients
   - Empathy
   - Personal resilience
   - Perspective-taking
   - Relationship building/team functioning
   - Self-reflection
   - Teaching/pedagogy
   - Wellness
   - Writing confidence
   - Writing skills

1. What did you find to be most valuable/informative/helpful about today’s session?
2. How could today’s session be made more valuable for future participants?
3. What professional and/or personal changes do you plan to make based on today’s session?
4. Do you have any other feedback about today’s session?
